# Supplementary material for: Fractional laser exposure induces neutrophil infiltration (N1 phenotype) into the tumor and stimulates systemic anti-tumor immune response
Source: PubMed Central journal article supplement (PMC5602663; doi:10.1371/journal.pone.0184852), 2017-09-18

A) Control

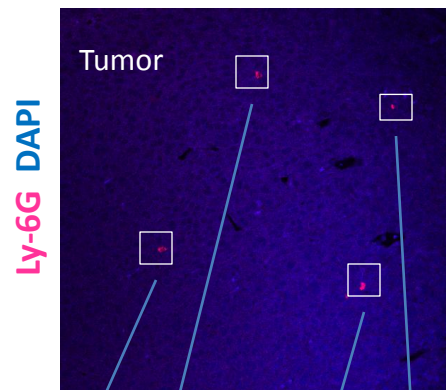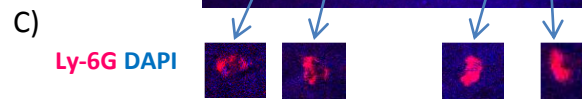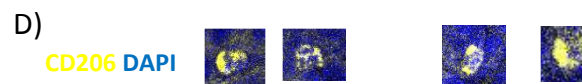

F) Control

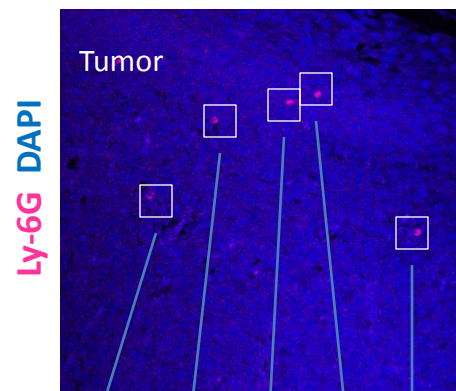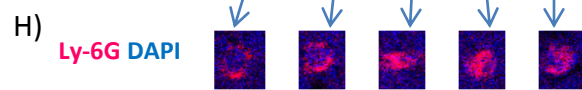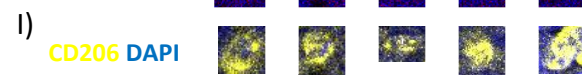

B) aFP

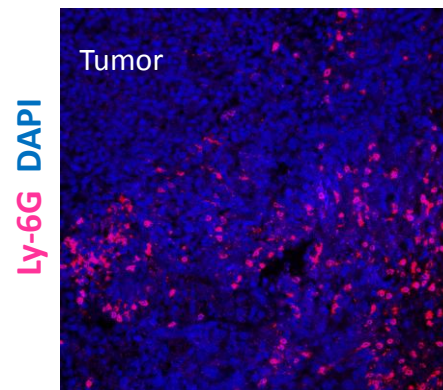

G) aFP

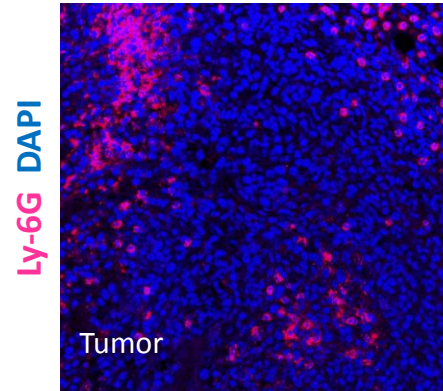

E) aFP

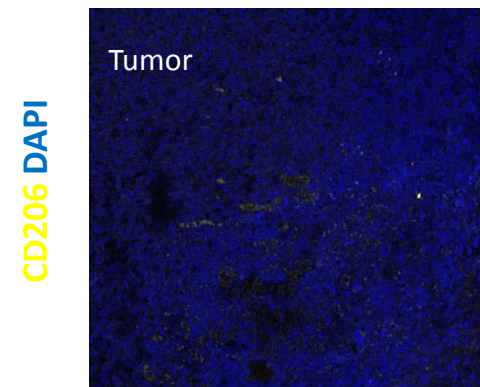

J) aFP

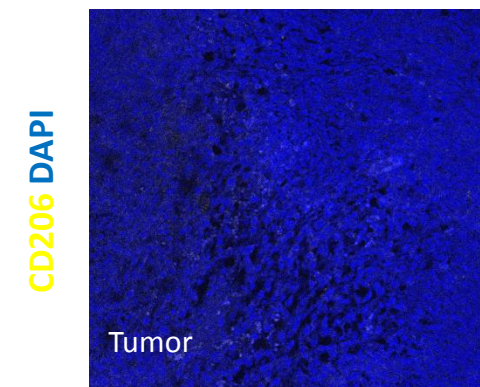

Supplement: pone.0184852.s005.pdf [file pone.0184852.s005.pdf]
