# Supplementary material for: Fractional laser exposure induces neutrophil infiltration (N1 phenotype) into the tumor and stimulates systemic anti-tumor immune response
Source: PubMed Central journal article supplement (PMC5602663; doi:10.1371/journal.pone.0184852), 2017-09-18

A)

Control

Cleaved caspase 3 DAPI

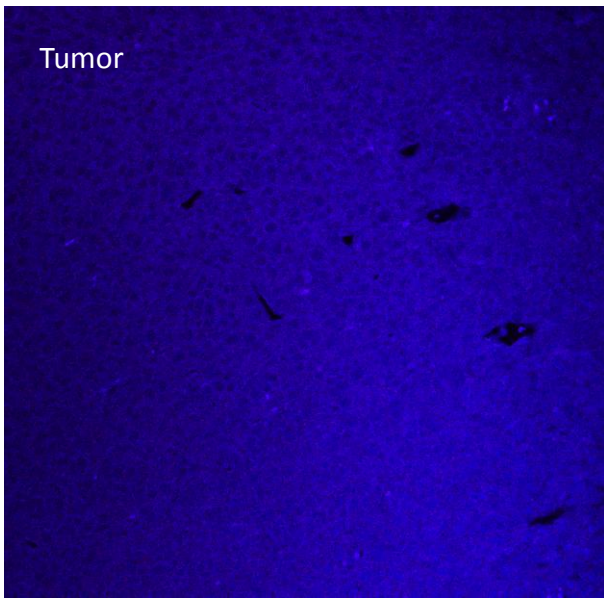

B)

aFP

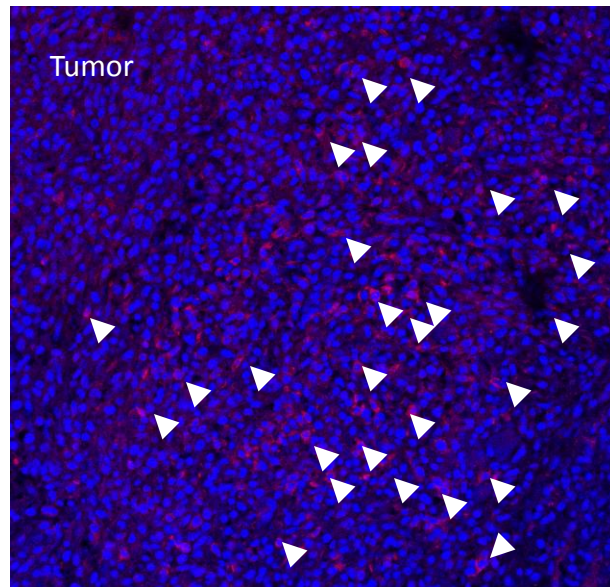

C)

Cleaved caspase 3 DAPI

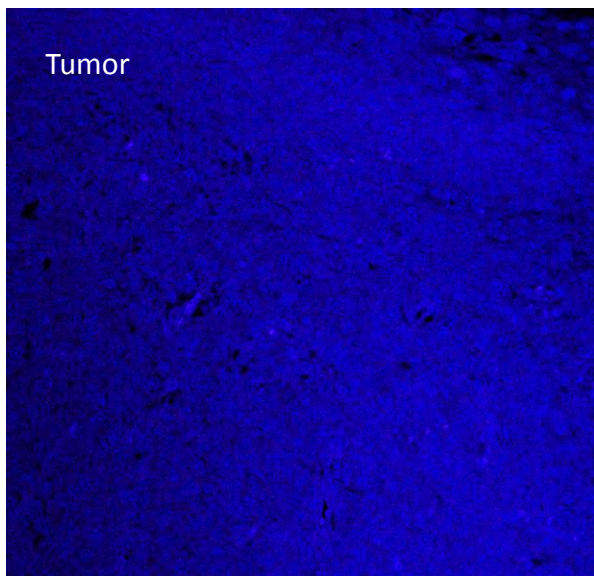

D)

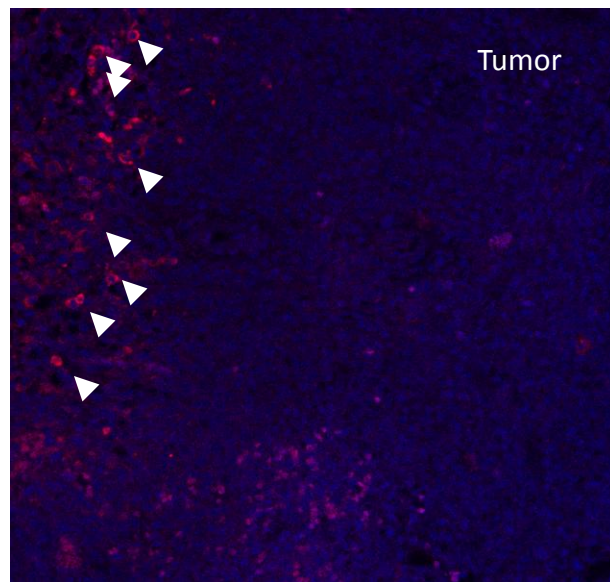

Supplement: pone.0184852.s006.pdf [file pone.0184852.s006.pdf]
